# Supplementary material for: Energy status of ripening and postharvest senescent fruit of litchi (Litchi chinensis Sonn.)
Source: PubMed Central journal article supplement (PMC3636124; doi:10.1186/1471-2229-13-55), 2013-04-02
Supplement: 1471-2229-13-55-S1.pdf [file 1471-2229-13-55-S1.pdf]

StAtpB MRINPTTSGSGVSTLEKKNPGRVVOIGPVLDAVFPPGKMPNIYNALVVKGRDVTGQPINVTCE 64  
SiAtpB -----TSGSGVSTLEKKNPGRVVOIGPVLDAVFPPGKMPNIYNALVVKGRDVTGQPINVTCE 56  
MaAtpB -----TSGPGISALDKKKLGHIAQIGPVLDAVFPPGKMPNIYNALVVKGRDVTGQPINVTCE 58  
LcAtpB -----TSGSGVSTLEKKNPGRVVOIGPVLDAVFPPGKMPNIYNALVVKGRDVTGQPINVTCE 25  
ZmAtpB MRTNPTTSRPGISTIEEKSVGRIDQIGPVLDTFPPGKLPYIYNALIVKSRDVTADKQINVTCE 64

StAtpB VQQLLGNNRVRAVAMSATDGLTRGMAVIDTGAPIRVPVGGATLGRIFNVLGEPVDNLGPVDTST 128  
SiAtpB VQQLLGNNRVRAVAMSATDGLMRGMEVIDTGAPLSVPVGGATLGRIFNVLGEPVDNLGPVDTRT 120  
MaAtpB VQQLLGNNRVRAVAMSATDGLTRGMEVIDMAGAPLSVPVGGATLGRIFNVLGEPVDNLGPVDTRT 122  
LcAtpB VQQLLGNNRVRAVAMSATDGLMRGMEVIDTGAPLSVPVGGATLGRIFNVLGEPVDNLGPVDTRT 89  
ZmAtpB VQQLLGNNRVRAVAMSAEGLMRGMEVIDTGTPLSVPVGGATLGRIFNVLGEPVDNLGPVDTSA 128

StAtpB TSPIHRSAPAFIQLDTKLSIFETGIKVVDLLAPYRRGGKIGLFGGAGVGKTVLELIMELINNIKA 192  
SiAtpB TFP IHRSAPAFIQLDTKLSIFETGIKVVDLLAPYRRGGKIGLFGGAGVGKTVLELIMELINNIKA 184  
MaAtpB TSP IHKPPAPAFIQLDTKLSIFETGIKVVDLLAPYRRGGKIGLFGGAGVGKTVLELIMELINNIKA 186  
LcAtpB TSP IHKSAPAFIQLDTKLSIFETGIKVVDLLAPYRRGGKIGLFGGAGVGKTVLELIMELINNIKA 153  
ZmAtpB TFP IHRSAPAFIELDTKLSIFETGIKVVDLLAPYRRGGKIGLFGGAGVGKTVLELIMELINNIKA 192

StAtpB HGGVSVFGGVGERTREGNDLYMEMKESGVINEKNIAESKVALVYQMNPEPPGARMRVGLTALTM 256  
SiAtpB HGGVSVFGGVGERTREGNDLYMEMKESGVINEENIAESKVALVYQMNPEPPGARMRVGLTALTM 248  
MaAtpB HGGVSVFGGVGERTREGNDLYMEMKESGVINEQNIAESKVALVYQMNPEPPGARMRVGLTALTM 250  
LcAtpB HGGVSVFGGVGERTREGNDLYMEMKESGVINEQNLIAESKVALVYQMNPEPPGARMRVGLTALTM 217  
ZmAtpB HGGVSVFGGVGERTREGNDLYMEMKESGVINEKNIEESKVALVYQMNPEPPGARMRVGLTALTM 256

StAtpB AEYFRDVEQDVLVLDINIFRFVQAGSEVSALLGRMPSAVGYQPTLSTEMGSLQERITSTKDGSG 320  
SiAtpB AEYFRDVEQDVLVLDINIFRFVQAGSEVSALLGRMPSAVGYQPTLSTEMGSLQERITSTKEGS 312  
MaAtpB AEYFRDVEQDVLVLDINIFRFVQAGSEVSALLGRMPSAVGYQPTLSTEMGSLQERITSTKEGS 314  
LcAtpB AEYFRDVEQDVLVLDINIFRFVQAGSEVSALLGRMPSAVGYQPTLSTEMGSLQERITSTKEGS 281  
ZmAtpB AEYFRDVKQDVLVLDINIFRFVQAGSEVSALLGRMPSAVGYQPTLSTEMGSLQERITSTKKGSG 320

StAtpB ITS IQAVYVPADDLTPAPATTF AHLDATTVLSRGLAAKGIYPAVDPLDSTSTMLQPRIVGEEH 384  
SiAtpB ITS IQAVYVPADDLTPAPATTF AHLDATTVLSRGLAAKGIYPAVDPLDSTSTMLQPRIVGEEH 376  
MaAtpB ITS IQAVYVPADDLTPAPATTF AHLDATTVLSRGLAAKGIYPAVDPLDSTSTMLQPRIVGEEH 378  
LcAtpB ITS IQAVYVPADDLTPAPATTF AHLDATTVLSRGLAAKGIYPAVDPLDSTSTMLQPRIVGEEH 345  
ZmAtpB ITS IQAVYVPADDLTPAPATTF AHLDATTVLSRGLAAKGIYPAVDPLDSTSTMLQPRIVGNEH 384

StAtpB YETAQRVKQTLQRYKELQDIAIILGLDELSEEDRLTVARARKIERFLSQPFFVAEVFTGSPGKY 448  
SiAtpB YETAQRVKQTLQRYKELQDIAIILGLDELSEEDRLTVARARKIERFLSQPFFVAEVFTGSPGKY 440  
MaAtpB YETAQRVKQTLQRYKELQDIAIILGLDELSEEDRLTVARARKIERFLSQPFFVAEVFTGSPGKY 442  
LcAtpB YETAQRVKQTLQRYKELQDIAIILGLDELSEEDRLTVARARKIERFLSQPFFVAEVFTGSPGKY 409  
ZmAtpB YETAQRVKE TLQRYKELQDIAIILGLDELSEEDRLTVARARKIERFLSQPFFVAEVFTGSPGKY 448

StAtpB VGLAETIRGFQILSGELDGLPEAQAFYLVGNTIDEATAKAMNLEMESNLKK 498  
SiAtpB VGLAETIRGFQILSGELDGLPEAQAFYLVGNIDEATAKAMNLEMESNLKK 490  
MaAtpB VGLAETIRGFQILSGELDGLPEAQAFYLVGNIDEVTAKATNLEMESNLKK 492  
LcAtpB VGLAETIRGFKILSGELDGLPEAQAFYLVGNIDEVTAKATNLEMESNLKK 459  
ZmAtpB VGLAETIRGFQILSGELDGLPEAQAFYLVGNIDEASTKAINLEESKLLKK 498
