# Supplementary material for: Energy status of ripening and postharvest senescent fruit of litchi (Litchi chinensis Sonn.)
Source: PubMed Central journal article supplement (PMC3636124; doi:10.1186/1471-2229-13-55), 2013-04-02
Supplement: 1471-2229-13-55-S3.pdf [file 1471-2229-13-55-S3.pdf]

StAOX - -MMTRG-ATRMRTRVVMGHMGPRYFSTVLRNDPDTGVVGGAAAGLLHGFPANPSEKAVVTW 59  
 NgAOX1a - -MMTRG-ATRMRTRVMGYMGPRYFSTVLRNDARTGVMTG-AAGFMHGVPANPSEKAVVTW 58  
 AtAOX1A - -MMITRG-GAKAAKSLLVAAAGPRLFSTVVRTVSSHEA-----LSASHIL-KPGVTS-AW--IW 51  
 LcAOX1 - -MMTRG-GTKLANSLVLAGHRFLSTATAKAASNT-----AVAGFLT-ERTVGRPAWNTTF 53  
 PtAOX MMMASRGEGVKLASSMMLFSRSFSTAISRGI IAKEA-----VTAKAVE-CHGDVVRKNIGEF 56  
 OsAOX - -MSSRM-----AGATLLRHLGPRLFAAEPVYSGLAAS-----ARGVMP----- 37

StAOX VRHFSAMGSRSSASTAALNDKQEQEKESDDKVENTATAAAA---NGGAG--KSVVSYWGVPPS 115  
 NgAOX1a FRHFVAMGSRSSASTMALNGKQ-----HDKKVETGAAAS---VGGGDGDEKSVVSYWGVPPS 112  
 AtAOX1A TRAPTIGGMRFASTITLGEKTPMKEEDANQKKTENESTGGDAAGGNKGDKGIASYWGVPEP 113  
 LcAOX1 LVRSQLVGVRRNGGTALGQKN-----EEEEKKKAVD-----GGNDKDKKAVSYWVVEAP 103  
 PtAOX WVRSVVFVGRHGSTMVSGEKDQKQVEMKQTQSVAE-----GGDKEEKKEIASYWGVPPS 110  
 OsAOX -AAARIFPARMASTSSAGADVKEGAAEKLPEPAATAAAA---ATDPQNKKAIVSYWGIQPP 94

StAOX KATKPDGTEWKWNCFRPWETYEADMSIDLTKHHAPVTFLLDKFAYWTVKVLRFPTDVFQRRY 177  
 NgAOX1a KVTKEDGTEWKWNCFRPWETYKADLSIDLTKHHAPTTFLLDKFAYWTVKALRYPTDIFQRRY 174  
 AtAOX1A KITKEDGSEWKWNCFRPWETYKADITIDLKHHVPTTFLLDRIAYWTVKSLRWPTDFFQRRY 175  
 LcAOX1 KLTKEDGTEWKWNCFRPWETYKADLSIDLKHHAPATFMDKLAFWTVKALRWPTDLFFQRRY 165  
 PtAOX RVTKEDGAEWKWNCFRPWETYSADLSIDLKHHVPTATFLDKMAVWTVKALRFPTDLFFQRRY 172  
 OsAOX KLVKEDGTEWKWLSFRPWDTYTSIDTSLKHHVPTFLDKMAYWTVKALRWPTDLFFQRRH 156

StAOX GCRAMMLETVAAVPGMVGGMLLHCKSLRRFEQSGGWI KALLEEAENERMHLMTFMEVAKPNV 239  
 NgAOX1a GCRAMMLETVAAVPGMVGGMLLHCKSLRRFEQSGGWI KALLEEAENERMHLMTFMEVAKPNV 236  
 AtAOX1A GCRAMMLETVAAVPGMVGGMLLHCKSLRRFEQSGGWI KALLEEAENERMHLMTFMEVAKPKW 237  
 LcAOX1 GCRAMMLETVAAVPGMVGGULLHCKSLRRFEHSGGWI KALLEEAENERMHLMTFMEVTKPKW 227  
 PtAOX GCRAMMLETVAAVPGMVGGMLLHCKSLRRFEHSGGWI KTLLEDAENERMHLMTFMEVAKPRW 234  
 OsAOX ASHALLETVAVGVPGMVGGMLLHLRSLRRFEQSGGWI RALLEEAENERMHLMTFLEVMPQRW 218

StAOX YERALVFAVQGVFFNAYFAAYLISPKLAHRI VGYLEEEAVHSYTEFLKELDNGNIENVPAPA 301  
 NgAOX1a YERALVFAVQGVFFNAYFVYTLISPKLAHRI VGYLEEEAHSYTEFLKELDKGNIENVPAPA 298  
 AtAOX1A YERALVITVQGVFFNAYFLGYLISPKFAHRMVGYLEEEAHSYTEFLKELDKGNIENVPAPA 299  
 LcAOX1 YERALVITVQGVFFNAYFLGYLISPKFAHRMVGYLEEEAHSYTEFLKELDKGNIENVPAPA 289  
 PtAOX YERALVITVQGVFLNAYFLGYLISPKFAHRMVGYLEEEAHSYTEFLKELDKGNIENVPAPA 296  
 OsAOX WERALVLAAGGVFFNAYFVGYLVSPKFAHRFVGYLEEEAVSSYTEFLKDLLEAGKIENVPAPA 280

StAOX IATDYWRLPKDATL RDVVLVVRADAEHHRDRCQPLCI----- 337  
 NgAOX1a IATDYWRLPKDSL RDVVLVVRADAEHHRD VNHFASDIHYQQQLKDS PAPIGYH 353  
 AtAOX1A IATDYWRLPADATL RDVVMVVRADAEHHRD VNHFASDIHYQQRELKEAPAPIGYH 354  
 LcAOX1 IATDYWRMPDSTL RDVVMVVRADAEHHRD VNHFASDVHYQQRELREAPAPIGYH 344  
 PtAOX IATDYWRLPADATL RDVVLVVRADAEHHRD VNHFASDIHYQQRELKEAPAPIGYH 351  
 OsAOX IATDYWRLPADATL KDVVTVI VRADAEHHRD LNHFASDIQQQGMKLDTPAPIGYH 335
