# Supplementary material for: Energy status of ripening and postharvest senescent fruit of litchi (Litchi chinensis Sonn.)
Source: PubMed Central journal article supplement (PMC3636124; doi:10.1186/1471-2229-13-55), 2013-04-02
Supplement: 1471-2229-13-55-S7.pdf [file 1471-2229-13-55-S7.pdf]

AtAAC2 -----MVEQTQHPFTILQKVGQLSSSSVSQDIRGY 30  
 AtAAC1 -----MVDQVQHPTIAQKAAGQFMRSSSVSKDVQ-- 28  
 RcAAC -----MADQVQYPSVMQKVAGQYLHSSLSQDFQGF 30  
 LcAAC1 MEKKQSERRRQTDQPVTSCHQSLFSLFSGKVMADQVQYPSVMQKVASQLLHSSSLTHDVRSC 62  
 ZmANT -----MADQANQPTVLHKLGGQFHLRSI ISEGVRA 30

AtAAC2 ASASKRPATYQKHAAYGNYSNAAFQYPLVAAS-----QIATTTSPVFVQAPGEGKFTNFIAI 86  
 AtAAC1 -VGYQRPSMYQRHATYGNYSNAAFQYPPSTR-----MLATTASPVFVQPTGEGKFTNFAL 82  
 RcAAC DGSLQRPALYQRR-AYGNYSNAAFQYPMGCA-- --DLSVPTTASSVVCVQAPSEKGFAGFAI 87  
 LcAAC1 DGAFNRPALYQRR-TYGNYSNAAFHPVVRACGATSDMSMVASTASPVFVQAPSEKGFAGFAI 123  
 ZmANT RNICPSVSSYERRFATRNYMTQSLWGPSMSVSG-- -GINVPMQTPLCANAPAEKGGKNFMI 89

AtAAC2 DFMGGVSAAVSKTAAAPIERVKLLIQNQDEMLKAGRLTEPYKGI RDCFGRTIRDEGIGSLW 148  
 AtAAC1 DFLMGGVSAAVSKTAAAPIERVKLLIQNQDEMIKAGRLSEPYKGI DCFGKRTIKDEGFGSLW 144  
 RcAAC DFLMGGVSAAVSKTAAAPIERVKLLIQNQDEMIKSGRLSEPYKGI DCFGKRTIKDEGFGSLW 149  
 LcAAC1 DFLMGGVSAAVSKTAAAPIERVKLLIQNQDEMIKTGRLSEPYKGI DCFGKRTMKDEGIVSLW 185  
 ZmANT DFMGGVSAAVSEETAAAPIERVKLLIQNQDEMIKSGRLSEPYKGI VDCFKRTIKDEGFGSLW 151

AtAAC2 RGNTANVIRYFPTQALNFAFKDYFKRLFNFKKDRDGYWKWFAGNLASGGAAGASSLLFVYSL 210  
 AtAAC1 RGNTANVIRYFPTQALNFAFKDYFKRLFNFKKDRDGYWKWFAGNLASGGAAGASSLLFVYSL 206  
 RcAAC RGNTANVIRYFPTQALNFAFKDYFKRLFNFKKDRDGYWKWFAGNLASGGAAGASSLLFVYSL 211  
 LcAAC1 RGNTANVIRYFPTQALNFAFKDYFKRLFNFKKDRDGYWKWFAGNLASGGAAGASSLLFVYSL 247  
 ZmANT RGNTANVIRYFPTQALNFAFKDYFKRLFNFKKDRDGYWKWFAGNLASGGAAGASSLLFVYSL 213

AtAAC2 DYARTRLANDSKSAKKGGEERQFNGLVDVYRKTKLKS DGIAGLYRGFNISCAGIIVYRGLYFG 272  
 AtAAC1 DYARTRLANDAKAAKKGGEERQFDGLVDVYRKT LKT DGIAGLYRGFNISCVGIIVYRGLYFG 268  
 RcAAC DYARTRLANDAKAAKKGGEERQFNGLVDVYRKT L ASDGIAGLYRGFNISCVGIIVYRGLYFG 272  
 LcAAC1 DYARTRLANDAKAAKKGGEERQFNGLVDVYRKT M KSDGIAGLYRGFNISCVGIIVYRGLYFG 308  
 ZmANT DYARTRLANDAKAAKKGGEERQFNGLVDVYRKT L KSDGIAGLYRGFNISCVGIIVYRGLYFG 274

AtAAC2 LYDSVKPVL L TGD LQDSFFASFALGWLITNGAGLASYPIDTVRRRMMMTSGEAVKYKSSLDA 334  
 AtAAC1 LYDSVKPVL L TGD LQDSFFASFALGWLITNGAGLASYPIDTVRRRMMMTSGEAVKYKSSLDA 330  
 RcAAC MYDSLKPVL L TGNLQDSFFASFALGWLITNGAGLASYPIDTVRRRMMMTSGEAVKYRGLS L DA 334  
 LcAAC1 MYDSLKPVL L TGS LQDSFFASFALGWLITNGAGLASYPIDTVRRRMMMTSGEAVKYKSSLDA 370  
 ZmANT LYDSIKPVL L TGNLQDNFFASFALGWLITNGAGLASYPIDTVRRRMMMTSGEAVKYKSSLDA 336

AtAAC2 FSQIVKKEGAKSLFKGAGANILRAVAGAGVLAGYDKLQLIVFGKKYGSGGA- 385  
 AtAAC1 FKQILKNEGAKSLFKGAGANILRAVAGAGVLSGYDKLQLIVFGKKYGSGGA- 381  
 RcAAC FSQILKNEGAKSLFKGAGANILRAVAGAGVLAGYDKLQLIVFGKKYGSGGA- 385  
 LcAAC1 FSQILKNEGAKSLFKGAGANILRAVAGAGVLAGYDKLQLIVFGKKYGSGGA 422  
 ZmANT FQQLKKEGPKSLFKGAGANILRAIAGAGVLSGYDQLQLIFVFGKKYGSGGA- 387
