# Supplementary material for: Energy status of ripening and postharvest senescent fruit of litchi (Litchi chinensis Sonn.)
Source: PubMed Central journal article supplement (PMC3636124; doi:10.1186/1471-2229-13-55), 2013-04-02

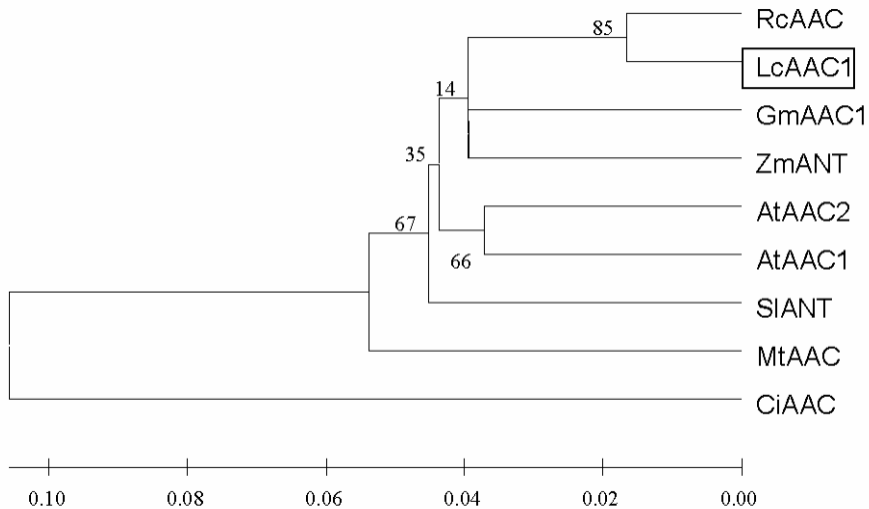

Supplement: 1471-2229-13-55-S8.pdf [file 1471-2229-13-55-S8.pdf]
