# Supplementary material for: Energy status of ripening and postharvest senescent fruit of litchi (Litchi chinensis Sonn.)
Source: PubMed Central journal article supplement (PMC3636124; doi:10.1186/1471-2229-13-55), 2013-04-02
Supplement: 1471-2229-13-55-S9.pdf [file 1471-2229-13-55-S9.pdf]

RcSAPK1 -----MERYEILKDIGSGNFGVAKLVRDRWTKELFAVKFIERGDKIDE 43  
 LcSnRK2 -----MEKYEIVKDIGSGNFGVAKLVRDWTWDELFAVKFIERGDKIDE 43  
 GmSAPK2 -----MERYEILKDIGSGNFGVAKLVRDNYTNELFAVKFIERGDKIDE 43  
 ZmSnRK2.2 -----MERYEIVKDIGSGNFGVAKLVRDVRTKELFAVKFIERGMKIDE 43  
 AtSnRK2.2 MDPATNSPIMPIDLPIMHDSRDYDFVKDIGSGNFGVARLMTDRVTKELVAVKYIERGEKIDE 62

1

RcSAPK1 HVQREIMNHRSLKHPNIVRFKEVRLTPTHLAIVMEYAAGGELFERICNAGRFSEDEARFFFQ 105  
 LcSnRK2 HVQREIMNHRSLKHPNIVRFKEVLLTPTHLAIVMEYAAGGELFERICNAGRFSEDEARFFFQ 105  
 GmSAPK2 HVQREIMNHRSLKHPNIVRFKEVLLTPTHLAIVMEYAAGGELFERICNAGRFSEDEARFFFQ 105  
 ZmSnRK2.2 NVQREIMNHRSLRHPNIVRFKEVLLTPTHLAIVMEYAAGGELFERICNAGRFSEDEARFFFQ 105  
 AtSnRK2.2 NVQREIINHRSLRHPNIVRFKEVLLTPSHLAIVMEYAAGGELYERICNAGRFSEDEARFFFQ 124

RcSAPK1 QLISGVSYCHSMQICHRDLKLENTLLDGSTAPRVKICDFGYS-----KSTVLHSQPKSTV 160  
 LcSnRK2 QLISGVSYCHSMQICHRDLKLENTLLDGSAAPRVKICDFGYS-----KSSVLHSQPKSTV 160  
 GmSAPK2 QLISGVSYCHSMQICHRDLKLENTLLDGSTAPRVKICDFGYS-----KSSVLHSQPKSTV 160  
 ZmSnRK2.2 QLISGVSYCHSMQICHRDLKLENTLLDSDIAPRLKICDFGYS-----KSSVLHSQPKSTV 160  
 AtSnRK2.2 QLISGVSYCHAMQICHRDLKLENTLLDGSPAPRLKICDFGYSKVLFIISKSSVLHSQPKSTV 186

2

RcSAPK1 GTPAYIAPEVLSKKEYDGGKADVWSCGVTLYVMLIGAYPFEDPDPPKNFRKTIGRILSVHYS 222  
 LcSnRK2 GTPAYIAPEVLCCKKEYDGGKADVWSCGVTLYVMLVGAYPFEDPADPPKNFKKTIGRILSAQYS 222  
 GmSAPK2 GTPAYIAPEVLTTRKEYDGGKADVWSCGVTLYVMLVGAYPFEDPADPPRNFKKTIGKILSVQYS 222  
 ZmSnRK2.2 GTPAYIAPEVLARKEYDGGKADVWSCGVTLYVMLVGAYPFEDPDEPPKNFRKTLTRILSVQYA 222  
 AtSnRK2.2 GTPAYIAPEILLRQEQYDGGKADVWSCGVTLYVMLVGAYPFEDPQEPDRYRKTIGRILSVTYS 248

RcSAPK1 IPDYVRVSIIECKHLLSRIFVYNPEKRISIPKIDHPWFLKNLPIELMEG--GSCQSHDVNNP 282  
 LcSnRK2 FPDYVRVTVIECKHLLSRIFAASPEKRISILEIRNHPWFLRNLVGLMEG--GSWQSNNDVNNP 282  
 GmSAPK2 VPDYVRVSMIECRHLLSQIFVASPEKRITIPKIDHPWFLRNLPMELTEG--GSWQMNNDVNNP 282  
 ZmSnRK2.2 VPDFVRVSMIECRHLLSRIFVAKPEQRITIPKIDHPWFLKNLPIEMTDEYQMNLLQVDMNVP 284  
 AtSnRK2.2 IPEDLHLSPECRHLISRIFVADPATRITIPKIDHPWFLKNLPGDLMDENRMGSQFQEPQIP 310

RcSAPK1 SQNIEEVVSIIEQEARKAVVLPKSGNLLLE---GSMDDLDDADADDCEDIETSGDFVCPL 338  
 LcSnRK2 SQSLEEVVLSIIEQASKPIEASRVEGHLG---SSMDDLDDLADVDVEDIETSGDFVCPL 338  
 GmSAPK2 SQNVEEVVLSIIEQEARKSLNVPKVGGLLTG---GSMDDLDDFADDEDLEDLETSGDFVCPI 338  
 ZmSnRK2.2 SQSLEEIMSIILEARKPGDGLKHAQLPGL---GSMELDDTDVDD--IDVEDSGDFVCAL 339  
 AtSnRK2.2 MQSLDTIMQIIESEATIPTRVNRCLDDFMADNLDLDDDMDDFDSESE-IDVDSSGEIVYAL 369

3
